# Supplementary material for: A monolithic sponge catalyst for hydrogen generation from sodium borohydride solution for portable fuel cells
Source: Royal Society of Chemistry journal article supplement (doi:10.1039/d0qi00911c), 2020-10-21
Supplement: d0qi00911c1.pdf [file d0qi00911c1.pdf]

# A monolithic sponge catalyst for hydrogen generation from sodium borohydride solution for portable fuel cells

Jifeng Deng,<sup>ab</sup> Bingxue Sun,<sup>c</sup> Jinrong Xu,<sup>a</sup> Yu Shi,<sup>c</sup> Lei Xie,<sup>c</sup> Jie Zheng<sup>\*a</sup> and Xingguo Li<sup>\*a</sup>

(a. Beijing National Laboratory for Molecular Science (BNLMS), College of Chemistry and Molecular Engineering, Peking University, Beijing 100871, China. E-mail: xgli@pku.edu.cn, zhengjie@pku.edu.cn; Fax: +86-10-62765930; Tel: +86-10-62765930.

b. Academy for Advanced Interdisciplinary Studies, Peking University, Beijing 100871, China

c. Sunan Institute for Molecular Engineering, Peking University, Building 6, Xianshi Road No.88, Changshu Hi-Tech Industrial Development Zone, Jiangsu 215500, China.)

|                                                                                                                                                                     |   |
|---------------------------------------------------------------------------------------------------------------------------------------------------------------------|---|
| Figure S1 XRD pattern of Co <sub>2</sub> B/PVFM sponge and the intermediate.....                                                                                    | 1 |
| Figure S2 XPS spectra and curve fitting profiles of Co <sub>2</sub> B/PVFM sponge.....                                                                              | 1 |
| Figure S3 SEM images and EDS mapping of the Co <sub>2</sub> B/PVFM sponge.....                                                                                      | 2 |
| Figure S4 The BET curves of pristine PVFM and Co <sub>2</sub> B/PVFM sponge.....                                                                                    | 2 |
| Figure S5 Study of the H <sub>2</sub> generation kinetics from Co <sub>2</sub> B/PVFM sponge catalysed hydrolysis of NaBH <sub>4</sub> in different conditions..... | 3 |
| Figure S6 The hydrolysis kinetics of 20 wt% NaBH <sub>4</sub> solution.....                                                                                         | 3 |
| Table S1 Comparison among Co-B catalysts of different work.....                                                                                                     | 4 |
| The calculation of hydrogen storage density D <sub>H</sub> .....                                                                                                    | 4 |
| Reference.....                                                                                                                                                      | 5 |

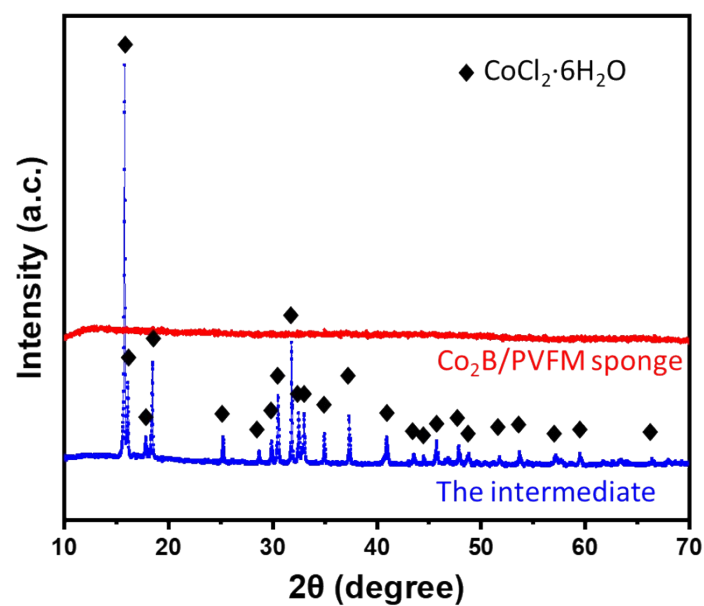

Figure S1 XRD pattern of  $\text{Co}_2\text{B}/\text{PVFM}$  sponge and the intermediate.

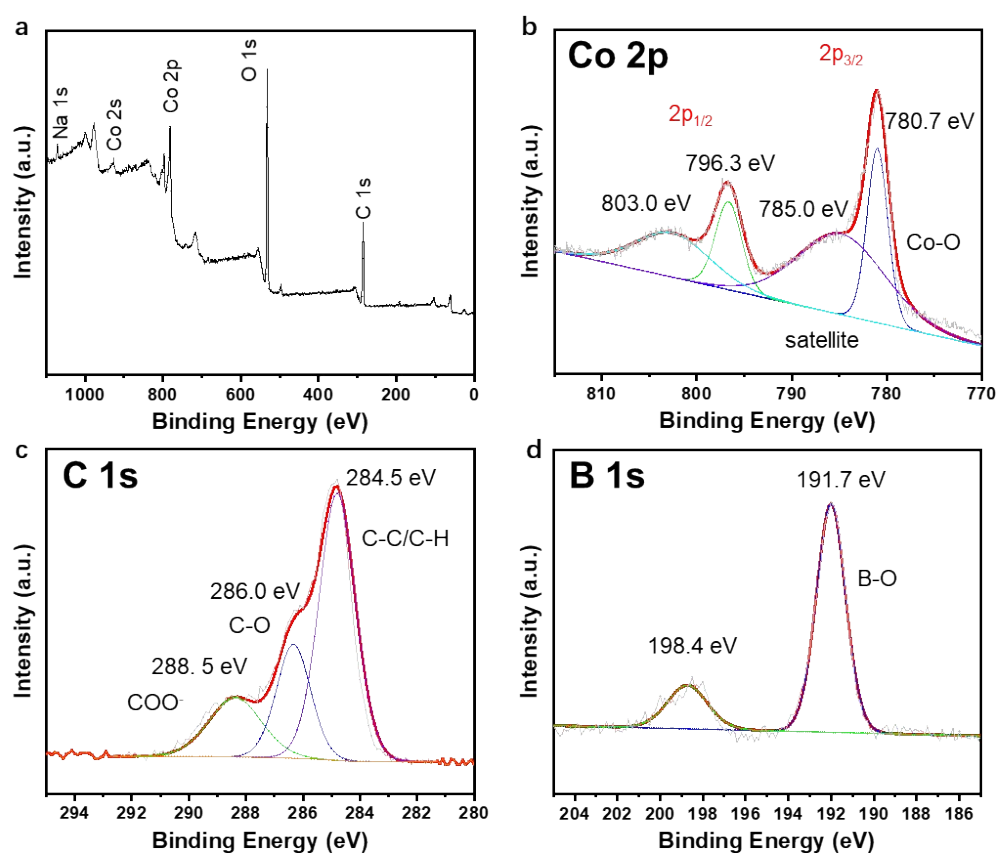

Figure S2 XPS spectra and curve fitting profiles of  $\text{Co}_2\text{B}/\text{PVFM}$  sponge: (a) survey, (b) Co 2p, (c) C 1s and (d) B 1s.

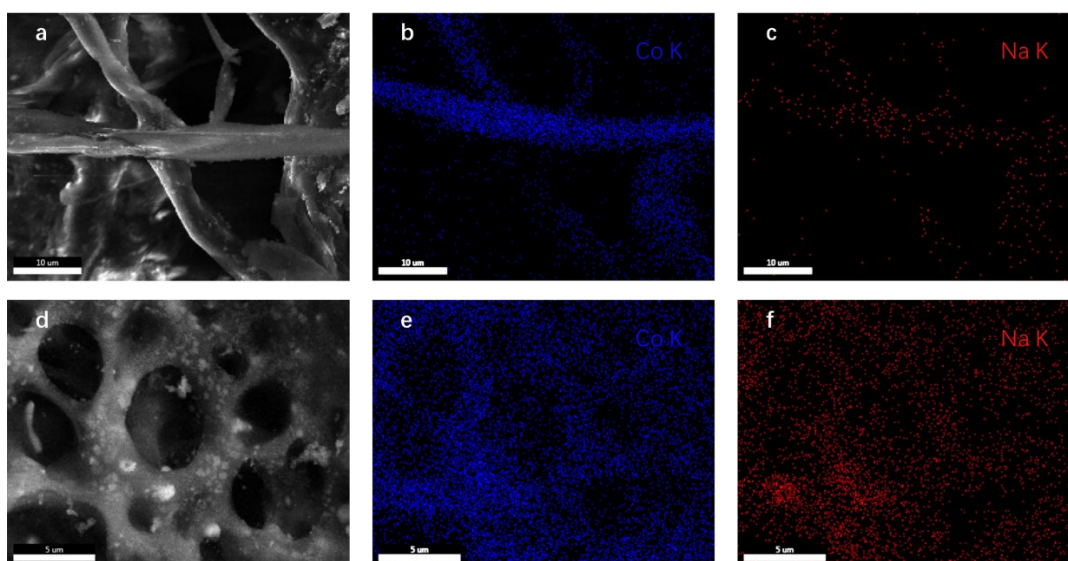

Figure S3 SEM images and EDS mapping of the Co<sub>2</sub>B/PVFM sponge after catalyzing the hydrolysis of 10 wt% (a, b, c) and 30 wt% (d, e, f) NaBH<sub>4</sub> solution.

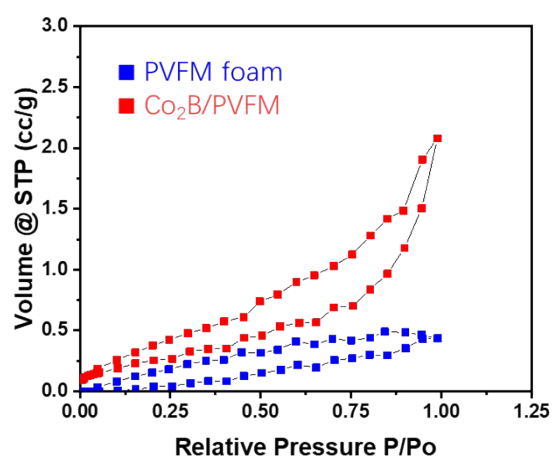

Figure S4 The BET curves of pristine PVFM and Co<sub>2</sub>B/PVFM

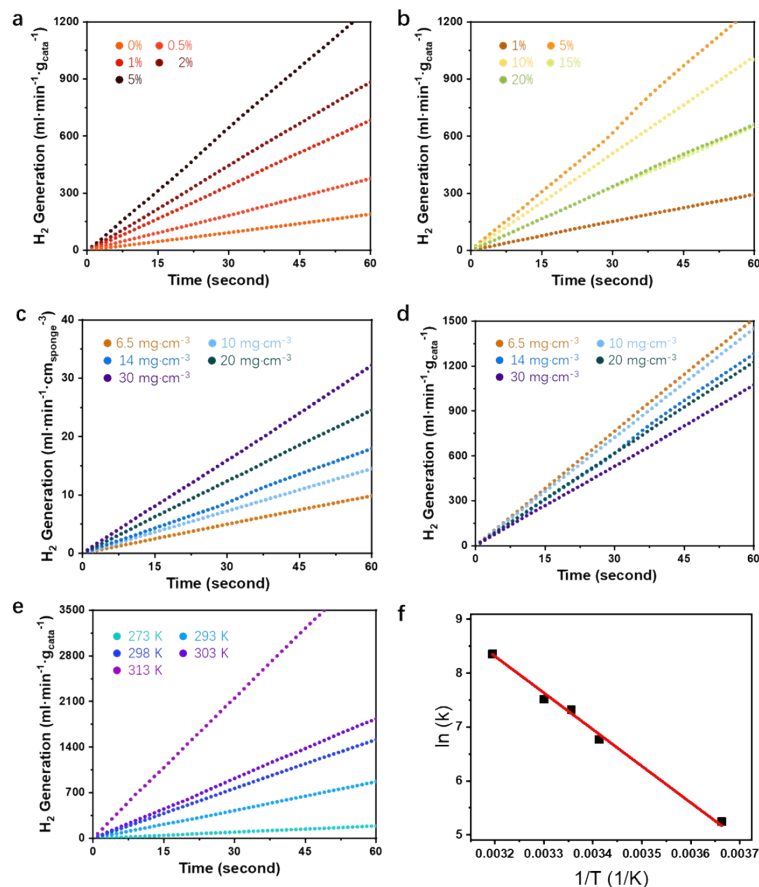

Figure S5 Study of the  $H_2$  generation kinetics from  $Co_2B/PVMF$  sponge catalysed hydrolysis of  $NaBH_4$  in different conditions: (a) Different  $NaOH$  concentrations (10 wt%  $NaBH_4$  at 298K). (b) Different  $NaBH_4$  concentrations (5 wt%  $NaOH$ , 298K). (c-d) Different Co-B loading (5 wt%  $NaBH_4$ , 5 wt%  $NaOH$  at 298K). The hydrogen generation rate is expressed in per volume of catalyst and per mass of catalyst in (c) and (d), respectively. (e) different temperature (5 wt%  $NaBH_4$ , 5 wt%  $NaOH$ ). (f) An Arrhenius plot for  $H_2$  generation based on (e).

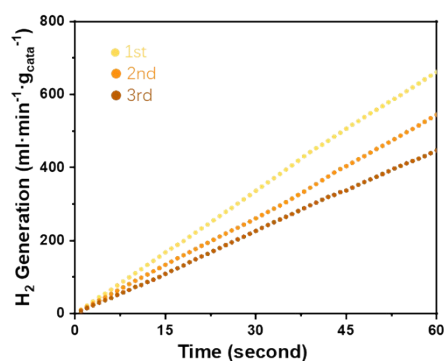

Figure S6 The hydrolysis kinetics of 20 wt%  $NaBH_4$  solution at 298 K catalysed by the  $Co_2B/PVMF$  sponge catalyst in 3 consecutive test.

Table S1 Comparison among Co-B catalysts of different work

| Catalyst (composition and form)   | Catalyst amount           | Catalytic activity                                          | Temperature | Mass fraction of NaBH <sub>4</sub> and NaOH | Activation energy(kJ·mol <sup>-1</sup> ) | Reference |
|-----------------------------------|---------------------------|-------------------------------------------------------------|-------------|---------------------------------------------|------------------------------------------|-----------|
| CoB/Ni-foam                       | 15 mg·cm <sup>-2</sup>    | 1930 ml·min <sup>-1</sup> g <sub>CoB</sub> <sup>-1</sup>    | 293 K       | 1 wt% NaBH <sub>4</sub> & 5 wt% NaOH        |                                          | 1         |
| PVDF/CoCl <sub>2</sub>            | 0~5 wt <sub>CoCl2</sub> % | 1709 ml·min <sup>-1</sup> mol <sub>CoCl</sub> <sup>-1</sup> | 298 K       | 5 wt% NaBH <sub>4</sub> & 5 wt% NaOH        |                                          | 2         |
| PVDF/CoCl <sub>2</sub> /Y-zeolite | 5 wt <sub>Co</sub> %      | 1977 ml·min <sup>-1</sup> mol <sub>CoCl</sub> <sup>-1</sup> | 333 K       | 0.6 wt% NaBH <sub>4</sub>                   | 49                                       | 3         |
| Co-B@AHs                          |                           |                                                             | 303 K       | 5 wt% NaBH <sub>4</sub> & 5 wt% NaOH        | 56                                       | 4         |
| Co <sub>2</sub> B/PVFM            | 6.5 mg/cm <sup>3</sup>    | 1500 ml·min <sup>-1</sup> mol <sub>cata</sub> <sup>-1</sup> | 298 K       | 5 wt% NaBH <sub>4</sub> & 5% NaOH           | 56                                       | this work |

The calculation of hydrogen storage density

The calculation used to determine the hydrogen storage density of our system is as following:

$$D_H = \frac{m_H}{m_s} \times 100\%$$

, where  $D_H$  represents the hydrogen storage density,  $m_H$  represents the mass of H<sub>2</sub> released by our system during hydrolysis,  $m_s$  represents the mass of the materials, including sponge catalyst and NaBH<sub>4</sub> solution(water included).

## Reference

1. S. Guo, Q. Wu, J. Sun, T. Chen, M. Feng, Q. Wang, Z. Wang, B. Zhao and W. Ding, Highly stable and controllable CoB/Ni-foam catalysts for hydrogen generation from alkaline  $\text{NaBH}_4$  solution, *International Journal of Hydrogen Energy*, 2017, **42**, 21063-21072.
2. A. Chinnappan, H.-C. Kang and H. Kim, Preparation of PVDF nanofiber composites for hydrogen generation from sodium borohydride, *Energy*, 2011, **36**, 755-759.
3. Q. Li, Y. Chen, D. J. Lee, F. Li and H. Kim, Preparation of Y-zeolite/ $\text{CoCl}_2$  doped PVDF composite nanofiber and its application in hydrogen production, *Energy*, 2012, **38**, 144-150.
4. L. Ai, X. Gao and J. Jiang, In situ synthesis of cobalt stabilized on macroscopic biopolymer hydrogel as economical and recyclable catalyst for hydrogen generation from sodium borohydride hydrolysis, *Journal of Power Sources*, 2014, **257**, 213-220.
